# Supplementary material for: Kidney Tumor Biomarkers Revealed by Simultaneous Multiple Matrix Metabolomics Analysis
Source: Oxford University Press journal article supplement (doi:10.1158/0008-5472.can-11-3105), 2012-05-25
Supplement: 00085472can113105-sup-t3_xls_27k.xls [file 00085472can113105-sup-t3_xls_27k.xls]

## Sheet: Tissue
Supplemental Table 3a. Differential analysis of metabolite intensities in tissue comparing xenograft and sham surgery mice. P-values were derived based on a complete permutation null distribution.
Metabolite	Raw p.value	FDR	Fold (Cancer/Control)
1-linoleoylglycerophosphocholine	0.0001554	0.000507893	0.198881
1-palmitoylglycerol (1-monopalmitin)	0.0001554	0.000507893	0.231348
1-palmitoylglycerophosphocholine	0.0001554	0.000507893	0.244057
1-palmitoylglycerophosphoinositol*	0.0001554	0.000507893	0.20896
2-docosahexaenoylglycerophosphoethanolamine*	0.0001554	0.000507893	0.250576
2-hydroxyglutarate	0.0001554	0.000507893	3.07971
5-oxoproline	0.0001554	0.000507893	0.385638
6-phosphogluconate	0.0001554	0.000507893	12.7829
acetylcarnitine	0.0001554	0.000507893	3.20161
acetylphosphate	0.0001554	0.000507893	0.457326
adenosine 5-monophosphate (AMP)	0.0001554	0.000507893	0.186407
asparagine	0.0001554	0.000507893	0.216143
aspartate	0.0001554	0.000507893	0.449375
butyrylcarnitine	0.0001554	0.000507893	19.2149
C-glycosyltryptophan*	0.0001554	0.000507893	6.00907
chiro-inositol	0.0001554	0.000507893	0.268427
cholesterol	0.0001554	0.000507893	0.543127
choline	0.0001554	0.000507893	0.355355
cis-aconitate	0.0001554	0.000507893	4.16821
citrate	0.0001554	0.000507893	21.0513
citrulline	0.0001554	0.000507893	1.95164
cysteine	0.0001554	0.000507893	2.245
cysteine-glutathione disulfide	0.0001554	0.000507893	232.433
dihydrocholesterol	0.0001554	0.000507893	0.0797346
docosahexaenoate (DHA; 22:6n3)	0.0001554	0.000507893	0.317712
eicosapentaenoate (EPA; 20:5n3)	0.0001554	0.000507893	0.348618
ethanolamine	0.0001554	0.000507893	0.0660307
flavin adenine dinucleotide (FAD)	0.0001554	0.000507893	0.0976948
fructose-6-phosphate	0.0001554	0.000507893	39.0824
fucose	0.0001554	0.000507893	0.230368
gamma-aminobutyrate (GABA)	0.0001554	0.000507893	0.0225659
gamma-glutamylalanine	0.0001554	0.000507893	15.58
gamma-glutamylglutamate	0.0001554	0.000507893	40.0851
gamma-glutamylglutamine	0.0001554	0.000507893	18.3218
gamma-glutamylphenylalanine	0.0001554	0.000507893	3.48061
glucose	0.0001554	0.000507893	0.392162
glucose-6-phosphate (G6P)	0.0001554	0.000507893	85.1556
glucuronate	0.0001554	0.000507893	0.016087
glutaroyl carnitine	0.0001554	0.000507893	0.071227
glycerate	0.0001554	0.000507893	0.012318
glycerophosphorylcholine (GPC)	0.0001554	0.000507893	35.7251
glycylproline	0.0001554	0.000507893	0.372303
gulono-14-lactone	0.0001554	0.000507893	0.0730835
histidine	0.0001554	0.000507893	0.428019
hydroxyisovaleroyl carnitine	0.0001554	0.000507893	0.247245
hypoxanthine	0.0001554	0.000507893	0.473252
Isobar: fructose 16-diphosphate glucose 16-diphosphate	0.0001554	0.000507893	117.395
Isobar: ribulose 5-phosphate xylulose 5-phosphate	0.0001554	0.000507893	22.6092
isoleucine	0.0001554	0.000507893	0.53683
isovalerylcarnitine	0.0001554	0.000507893	15.0479
lactate	0.0001554	0.000507893	2.85157
lysine	0.0001554	0.000507893	0.498858
malonylcarnitine	0.0001554	0.000507893	0.214294
maltotetraose	0.0001554	0.000507893	101.079
mannose	0.0001554	0.000507893	0.110012
methylphosphate	0.0001554	0.000507893	0.277371
myo-inositol	0.0001554	0.000507893	0.202756
N-acetylaspartate (NAA)	0.0001554	0.000507893	5.97647
N-acetylglucosamine 6-phosphate	0.0001554	0.000507893	5.83204
N-acetylglycine	0.0001554	0.000507893	0.218434
N-acetylmethionine	0.0001554	0.000507893	7.48212
N-acetylthreonine	0.0001554	0.000507893	0.451836
N-glycolylneuraminate	0.0001554	0.000507893	8.1678
nicotinamide adenine dinucleotide (NAD+)	0.0001554	0.000507893	0.132691
palmitoyl sphingomyelin	0.0001554	0.000507893	0.323461
pantothenate	0.0001554	0.000507893	0.314389
phosphate	0.0001554	0.000507893	0.514476
phosphoethanolamine	0.0001554	0.000507893	5.44906
pipecolate	0.0001554	0.000507893	2.87268
putrescine	0.0001554	0.000507893	6.76307
ribitol	0.0001554	0.000507893	0.0517076
riboflavin (Vitamin B2)	0.0001554	0.000507893	0.0751181
ribose	0.0001554	0.000507893	0.0845444
scyllo-inositol	0.0001554	0.000507893	0.0923633
spermidine	0.0001554	0.000507893	2.20108
succinate	0.0001554	0.000507893	0.253073
thiamin (Vitamin B1)	0.0001554	0.000507893	0.16793
thymine	0.0001554	0.000507893	4.68711
tyrosine	0.0001554	0.000507893	0.53661
uridine	0.0001554	0.000507893	2.46102
xylitol	0.0001554	0.000507893	0.104631
xylulose	0.0001554	0.000507893	0.117311
1-palmitoylglycerophosphoethanolamine	0.0003108	0.000816613	0.23739
1-stearoylglycerophosphocholine	0.0003108	0.000816613	0.15965
2-docosahexaenoylglycerophosphocholine*	0.0003108	0.000816613	0.13867
2-methylbutyroylcarnitine	0.0003108	0.000816613	4.45631
5-aminovalerate	0.0003108	0.000816613	0.2097
arginine	0.0003108	0.000816613	0.491021
butyrylglycine	0.0003108	0.000816613	0.0959954
gamma-glutamylleucine	0.0003108	0.000816613	2.8016
gamma-glutamylmethionine	0.0003108	0.000816613	4.16277
glutamate gamma-methyl ester	0.0003108	0.000816613	0.306488
glycerol 2-phosphate	0.0003108	0.000816613	3.60595
glycine	0.0003108	0.000816613	0.537569
hypotaurine	0.0003108	0.000816613	0.295371
kynurenine	0.0003108	0.000816613	2.7821
leucine	0.0003108	0.000816613	0.535505
nicotinamide	0.0003108	0.000816613	0.515707
serine	0.0003108	0.000816613	0.357132
stearidonate (18:4n3)	0.0003108	0.000816613	0.128428
uracil	0.0003108	0.000816613	0.502773
valine	0.0003108	0.000816613	0.601522
1-arachidonoylglycerophosphoinositol*	0.0004662	0.00113583	0.383766
1-stearoylglycerol (1-monostearin)	0.0004662	0.00113583	0.619031
1-stearoylglycerophosphoinositol	0.0004662	0.00113583	0.383336
arabitol	0.0004662	0.00113583	0.367991
glutamine	0.0004662	0.00113583	0.590848
glycerol 3-phosphate (G3P)	0.0004662	0.00113583	6.40174
inositol 1-phosphate (I1P)	0.0004662	0.00113583	0.506826
threonine	0.0004662	0.00113583	0.625659
linolenate [alpha or gamma; (18:3n3 or 6)]	0.000621601	0.0015008	0.202888
1-oleoylglycerophosphoethanolamine	0.000777001	0.00181075	0.229816
choline phosphate	0.000777001	0.00181075	2.33875
gluconate	0.000777001	0.00181075	0.410041
valerylglycine	0.000777001	0.00181075	0.248846
1-octadecanol	0.000932401	0.00208236	0.653652
2-palmitoylglycerophosphoethanolamine*	0.000932401	0.00208236	0.44203
N-acetylleucine	0.000932401	0.00208236	0.459237
phenylalanine	0.000932401	0.00208236	0.702886
ribulose	0.000932401	0.00208236	0.25664
2-aminobutyrate	0.0010878	0.00237017	2.09263
alanine	0.0010878	0.00237017	0.721184
tryptophan	0.0010878	0.00237017	0.685493
1-oleoylglycerophosphocholine	0.0012432	0.00264427	0.438628
isovalerylglycine	0.0012432	0.00264427	0.260637
methionine	0.0012432	0.00264427	0.638069
7-beta-hydroxycholesterol	0.0013986	0.00290562	0.502872
fumarate	0.0013986	0.00290562	0.652542
urea	0.0013986	0.00290562	0.320976
56-dihydrouracil	0.0017094	0.0034706	0.494673
arachidonate (20:4n6)	0.0017094	0.0034706	0.593825
dihomo-linolenate (20:3n3 or n6)	0.0017094	0.0034706	0.683118
isobutyrylcarnitine	0.0018648	0.00375765	2.74201
fructose	0.0020202	0.00401048	0.356301
N-acetylalanine	0.0020202	0.00401048	1.43338
n-Butyl Oleate	0.0021756	0.00428722	0.643199
erythritol	0.002331	0.00455992	0.576017
creatine	0.0024864	0.00482867	2.01037
lathosterol	0.0026418	0.00505717	0.332848
palmitate (16:0)	0.0026418	0.00505717	0.534747
hexanoylglycine	0.0027972	0.00531667	0.260454
glycerol	0.0029526	0.00553355	0.434788
thymidine	0.0029526	0.00553355	0.526408
palmitoylcarnitine	0.0032634	0.00603167	4.601
xanthosine	0.0032634	0.00603167	0.592975
deoxycarnitine	0.0034188	0.00627561	1.92332
1-stearoylglycerophosphoethanolamine	0.003885	0.00708286	0.294267
stearoyl sphingomyelin	0.0040404	0.0072673	0.625395
taurocholate	0.0040404	0.0072673	0.355843
azelate (nonanedioate)	0.0041958	0.0074965	0.638776
sorbitol	0.0045066	0.00799848	0.0629287
propionylcarnitine	0.00512821	0.00904184	2.21735
3-phosphoglycerate	0.00543901	0.00952715	0.288859
cinnamoylglycine	0.00606061	0.010547	0.224647
stearoylcarnitine	0.00621601	0.0107477	3.85598
2-arachidonoylglycerophosphocholine*	0.00637141	0.010876	0.537308
gamma-glutamylvaline	0.00637141	0.010876	1.56495
1-arachidonoylglycerophosphoethanolamine*	0.00745921	0.0126523	0.5434
gamma-glutamyltyrosine	0.00792541	0.0133585	1.83964
phosphoenolpyruvate (PEP)	0.00839161	0.0140559	0.19018
2-palmitoleoylglycerophosphocholine*	0.00870241	0.014486	3.32589
1213-hydroxyoctadec-9(Z)-enoate	0.00947941	0.0155858	0.312929
nicotinamide riboside*	0.00947941	0.0155858	0.41829
2-docosapentaenoylglycerophosphocholine*	0.00994561	0.0162526	0.555529
5-methylthioadenosine (MTA)	0.0104118	0.0169113	0.651874
margarate (17:0)	0.0113442	0.0183148	0.542465
2-arachidonoylglycerophosphoinositol*	0.0114996	0.0184545	0.241195
cytidine 5-monophosphate (5-CMP)	0.0122766	0.0195841	0.814032
ascorbate (Vitamin C)	0.0136752	0.0216861	16.1063
glycylleucine	0.0138306	0.0218036	3.07971
linoleate (18:2n6)	0.0149184	0.0233809	0.49471
xylose	0.017871	0.0278455	0.53155
caprate (10:0)	0.0183372	0.0282435	0.736994
succinylcarnitine	0.0183372	0.0282435	1.45485
phenylacetylglycine	0.0188034	0.0287961	0.390449
caproate (6:0)	0.0197358	0.0300523	0.700219
2-palmitoylglycerophosphocholine*	0.0205128	0.0308845	0.637663
carnitine	0.0205128	0.0308845	1.30297
10-heptadecenoate (17:1n7)	0.0214452	0.0319296	0.530118
ornithine	0.0214452	0.0319296	0.691895
13-HODE + 9-HODE	0.0247086	0.0365851	0.511416
adrenate (22:4n6)	0.0251748	0.0370706	1.71979
oleate (18:1n9)	0.026418	0.0386887	0.543209
anserine	0.0278166	0.0405155	4.40393
2-arachidonoylglycerophosphoethanolamine*	0.0307692	0.0445738	0.726991
3-hydroxybutyrate (BHBA)	0.0343434	0.0494841	1.74599
myristate (14:0)	0.0376068	0.0538964	0.700747
phosphopantetheine	0.0382284	0.0544959	1.93715
910-hydroxyoctadec-12(Z)-enoic acid	0.0391608	0.0555297	0.406313
palmitoleate (16:1n7)	0.0400932	0.0565526	0.593686
2-aminoadipate	0.0405594	0.0569106	0.64213
erythronate*	0.0416472	0.0581326	1.47793
homostachydrine*	0.0421134	0.0584788	0.577685
hexadecanedioate	0.0445998	0.0616122	0.598912
eicosenoate (20:1n9 or 11)	0.045843	0.0630048	0.481727
phenylpropionylglycine	0.0464646	0.0635333	0.195036
adenine	0.0483294	0.0654156	0.708927
glycolate (hydroxyacetate)	0.0519037	0.0699004	0.688196
N-acetylornithine	0.0531469	0.0712168	0.735807
dehydroascorbate	0.0559441	0.0745921	1.65922
urate	0.0652681	0.086577	1.50534
beta-alanine	0.0655789	0.086577	1.49945
S-adenosylhomocysteine (SAH)	0.0671329	0.0881942	0.773212
proline	0.0724165	0.0946713	0.905551
2-linoleoylglycerophosphocholine*	0.0806527	0.104927	0.709755
1-linoleoylglycerophosphoethanolamine*	0.0882673	0.114278	0.644405
7-alpha-hydroxycholesterol	0.0933955	0.120337	0.413382
10-nonadecenoate (19:1n9)	0.102409	0.131318	0.588851
pyridoxate	0.110645	0.141204	0.577665
hippurate	0.112044	0.142311	0.571347
15-anhydroglucitol (15-AG)	0.120435	0.152248	0.829632
3-indoxyl sulfate	0.121523	0.152902	0.589876
laurate (12:0)	0.124942	0.156469	0.884743
phenol sulfate	0.125719	0.15671	0.648269
inosine	0.128516	0.159455	0.826793
stearate (18:0)	0.129604	0.160064	0.782529
pyrophosphate (PPi)	0.14188	0.174422	0.573941
docosapentaenoate (n3 DPA; 22:5n3)	0.148873	0.182183	0.834009
carnosine	0.151671	0.184762	2.99409
2-linoleoylglycerophosphoethanolamine*	0.15338	0.185912	1.72675
4-guanidinobutanoate	0.154002	0.185912	0.592809
1-myristoylglycerophosphocholine	0.171096	0.20489	1.67807
daidzein	0.171251	0.20489	0.424167
oleoylcarnitine	0.176535	0.210272	2.2985
trizma acetate	0.177622	0.210632	1.34639
N1-methylguanosine	0.179953	0.212437	1.24316
catechol sulfate	0.18073	0.212437	0.61163
sphingosine	0.1885	0.220603	0.715082
2-palmitoleoylglycerophosphoethanolamine*	0.19425	0.226344	1.48478
taurine	0.2	0.232035	1.20639
ergothioneine	0.208392	0.240728	0.804388
assymetric dimethylarginine (ADMA)	0.224087	0.257748	0.924505
mannitol	0.243978	0.279428	0.698994
caprylate (8:0)	0.253768	0.289404	0.771739
pseudouridine	0.277545	0.315178	0.862016
2-oleoylglycerophosphocholine*	0.282673	0.318829	0.895274
N1-methyladenosine	0.283139	0.318829	1.19777
xanthine	0.324476	0.363847	0.947415
2-docosapentaenoylglycerophosphoethanolamine*	0.338928	0.378469	0.854495
pelargonate (9:0)	0.344211	0.382774	0.90556
adenosine	0.347786	0.385151	0.893009
gamma-glutamylisoleucine*	0.373271	0.411674	0.922594
dihomo-linoleate (20:2n6)	0.3885	0.426714	0.841691
allantoin	0.425175	0.463876	1.58526
pentadecanoate (15:0)	0.425796	0.463876	0.833364
guanosine	0.460917	0.500104	1.36589
6-keto prostaglandin F1alpha	0.484071	0.52311	0.94823
2-hydroxyhippurate (salicylurate)	0.497436	0.535393	0.424296
arachidate (20:0)	0.527273	0.565236	1.10253
2-hydroxyisobutyrate	0.546542	0.583559	1.09947
sarcosine (N-Methylglycine)	0.553225	0.58835	0.0208277
4-hydroxybutyrate (GHB)	0.557731	0.590798	0.868577
pro-hydroxy-pro	0.568143	0.599458	0.921884
2-hydroxystearate	0.571251	0.600374	1.07226
prostaglandin E2	0.640249	0.668939	1.13098
corticosterone	0.643512	0.668939	0.635656
2-hydroxypalmitate	0.643978	0.668939	1.04316
3-ureidopropionate	0.657809	0.680667	1.05013
N-formylmethionine	0.676612	0.697431	0.538572
1-palmitoleoylglycerophosphocholine*	0.73209	0.751725	0.953125
2-oleoylglycerophosphoethanolamine*	0.747164	0.764275	1.02303
malate	0.767832	0.78243	1.02087
3-dehydrocarnitine*	0.80777	0.820009	0.90169
glutamate	0.846154	0.855733	1.00192
2-deoxyinosine	0.922455	0.929391	1.03377
heme*	0.941259	0.944784	0.611698
7-methylguanine	0.9554	0.9554	1.00047
